# Supplementary material for: A novel gold-nanocluster-based fluorescent sensor for detection of sodium 2-mercaptoethanesulfonate
Source: Royal Society of Chemistry journal article supplement (doi:10.1039/c9ra01563a), 2019-01-01
Supplement: c9ra01563a1.pdf [file c9ra01563a1.pdf]

## Supporting Information

*A novel gold-nanocluster-based fluorescent sensor for detection of sodium 2-  
mercaptoethanesulfonate*

*Jiaxing Su<sup>‡</sup>, Chenchen Feng<sup>‡</sup>, Yuan Wu\* and Jiangong Liang*

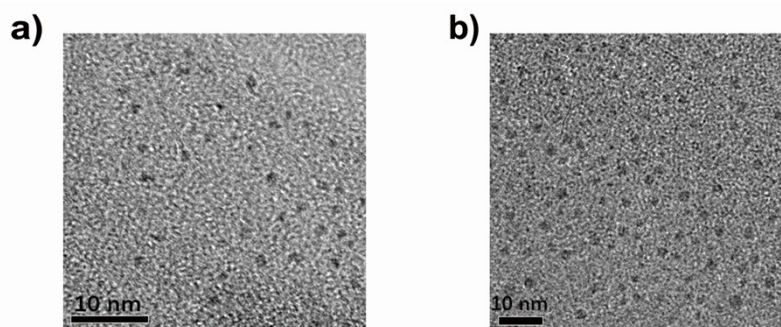

Fig. S1. The HR-TEM images of (a) His-Au NCs and (b) MES-Au NCs.

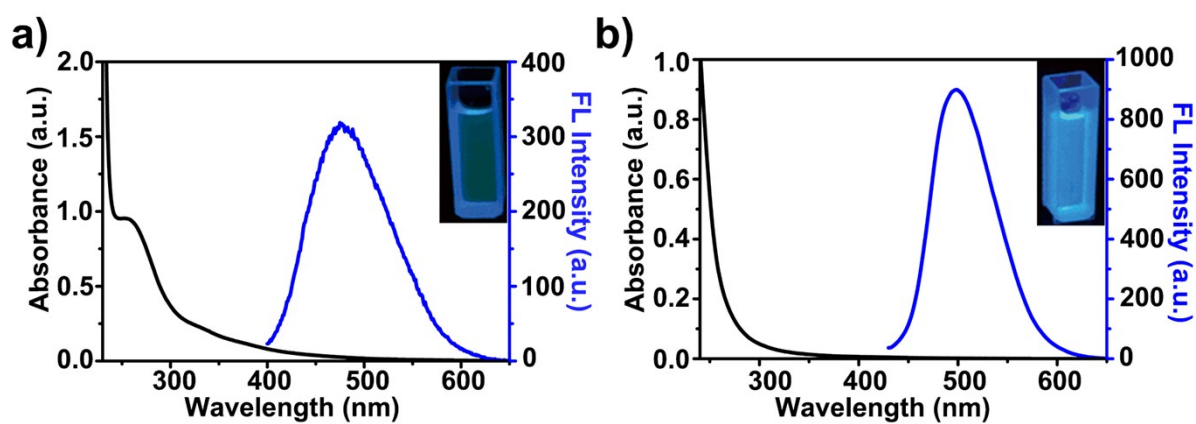

Fig. S2. UV absorption spectra (black line) and fluorescence emission spectra (blue line) under the excitation of 410 nm of (a) His-Au NCs and (b) MES-Au NCs.

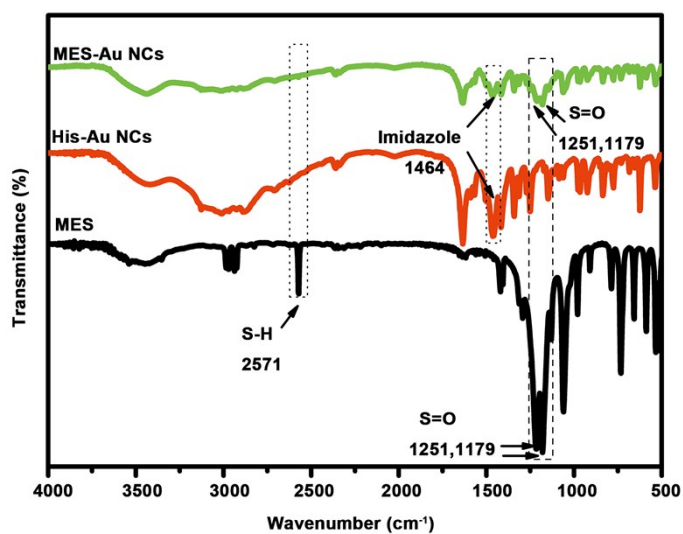

Fig. S3. The FT-IR data of His-Au NCs, MES and MES-capped Au NCs.

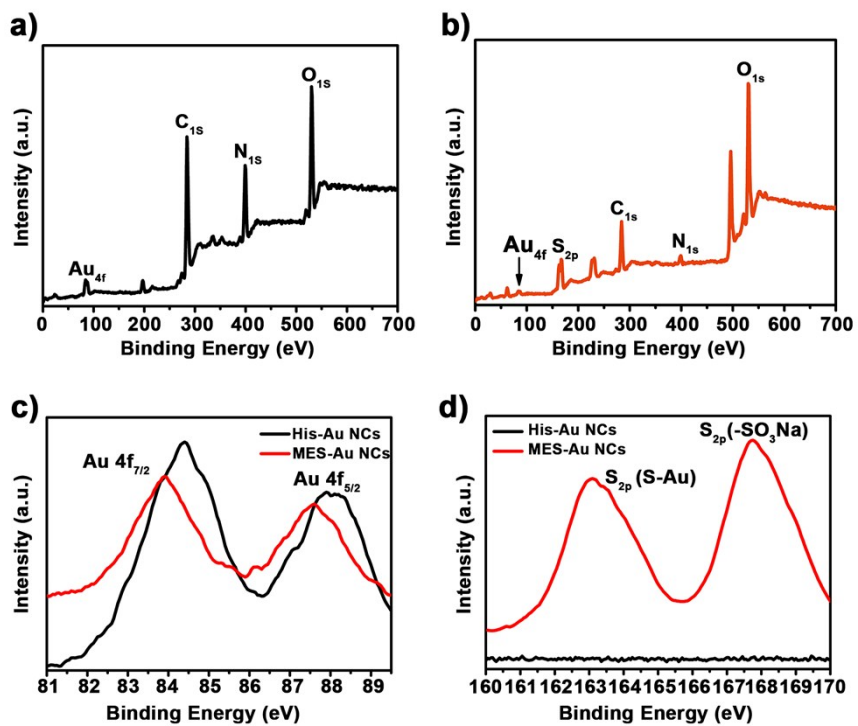

Fig. S4. XPS spectra of (a) Survey spectrum of His-Au NCs; (b) Survey spectrum of MES-Au NCs; (c) S<sub>2p</sub> region of His-Au NCs and MES-Au NCs, respectively; (d) Au<sub>4f</sub> region of His-Au NCs and MES-Au NCs, respectively.

Table S1 Comparison of analytical methods for MES detection

| No. | Method                                           | LOD (Limit of detection)                | Reference                                        |
|-----|--------------------------------------------------|-----------------------------------------|--------------------------------------------------|
| 1   | Reverse phase HPLC                               | 1.64 nM per 20 $\mu$ L injection volume | Biomed. Chromatogr., 2005, 19, 80-86.            |
| 2   | HPLC                                             | 7.5 $\mu$ g/ml                          | J. Chromatogr. Sci., 2015, 53, 742-748.          |
| 3   | LC-MS/MS                                         | 0.24 PPB                                | Expert Rev. Anticancer Ther., 2016, 16, 123-130. |
| 4   | Spectrophotometric method (leucoc rystal violet) | 0.10 $\mu$ g/mL                         | J. Anal. Chem., 2015, 70, 831-836.               |
| 5   | Spectrophotometric method (Ferric solution )     | 1.9 $\mu$ M                             | Asian J. Chem., 2011, 23, 3522-3524.             |
| 6   | Spectrophotometric method (Ag NPs)               | 10.2 $\mu$ M                            | Spectrochim. Acta, Part A, 2017, 179, 155-162.   |
| 7   | Chemiluminescence (Cerium, IV)                   | 8.4 $\mu$ M                             | Talanta, 2000, 51, 1155-1161.                    |
| 8   | Spectrophotometric method (Au NCs)               | 4.5 $\mu$ M                             | This work                                        |

Table S2 Determination of MES in uromitexan by the standard addition method.

| Nominal concentration ( $\mu$ M) | MES detected amount ( $\mu$ M) | The relative standard deviation (%) | MES added amount ( $\mu$ M) | Total detected amount ( $\mu$ M) | Recovery rate (%) |
|----------------------------------|--------------------------------|-------------------------------------|-----------------------------|----------------------------------|-------------------|
| 400.0                            | 377.1                          | 3.4                                 | 200                         | 583.2                            | 103.1             |
| 400.0                            | 379.7                          | 2.3                                 | 400                         | 778.66                           | 97.1              |
| 400.0                            | 380.5                          | 1.8                                 | 600                         | 1008.0                           | 104.6             |

## References

- 1 S. Mare, S. Penugonda and N. Ercal, *Biomed. Chromatogr.*, 2005, **19**, 80-86.
- 2 M. Rizk, E. A. Taha, S. Mowaka and Y. M. Abdallah, *J Chromatogr Sci*, 2015, **53**, 742-748.
- 3 D. Salman, J. Swinden, J. M. Peron, S. Barton and S. Nabhani-Gebara, *Expert Rev Anticancer Ther*, 2016, **16**, 123-130.
- 4 S. K. Vaishnav, K. Patel, K. Chandraker, J. Korram, R. Nagwanshi, K. K. Ghosh and M. L. Satnami, *Spectrochim. Acta, Part A*, 2017, **179**, 155-162.
- 5 W. X. Ma, N. Li, O. Sha and Y. H. Liu, *Asian J. Chem.*, 2011, **23**, 3522-3524.
- 6 B. Szpikowska-Sroka and A. Guz, *J. Anal. Chem.*, 2015, **70**, 831-836.
- 7 L. F. Capitán-Vallvey, M. C. V. Miron and R. A. Acosta, *Talanta*, 2000, **51**, 1155-1161.
